# Supplementary material for: The Effect of AlI3 Nanoadditive on the Thermal Behavior of PMMA Subjected to Thermoanalytical Py-GC-MS Technique
Source: MDPI journal article supplement (doi:10.3390/ma14227036), 2021-11-19
Supplement: s1 [file s1]

## Supplementary Material

# The Effect of $\text{AlI}_3$ Nano-additive on the Thermal Behavior of PMMA Subjected to Thermoanalytical Py-GC-MS Technique

Muhammad Adnan <sup>1</sup>, Taj Ur Rahman <sup>1,\*</sup>, Ali Bahadur <sup>2,\*</sup>, Muhammad Aurang Zeb <sup>1,\*</sup>, Wajiha Liaqat <sup>1</sup>, Takashiro Akitsu <sup>3</sup>, Shams H. Abdel-Hafez <sup>4</sup> and Wael A. El-Sayed <sup>5</sup>

<sup>1</sup> Department of Chemistry, Mohi-Ud-Din Islamic University, Nerian Sharif, Azad Jammu & Kashmir.

<sup>2</sup> Department of Transdisciplinary Studies, Graduate School of Convergence Science and Technology, Seoul National University, Seoul, 08826, South Korea.

<sup>3</sup> Department of Chemistry, Faculty of Science Division II, Tokyo University of Science, Tokyo, Japan

<sup>4</sup> Department of Chemistry, College of Science, Taif University. P.O.Box 11099, Taif 21944. Saudi Arabia

<sup>5</sup> Department of Chemistry, College of Science, Qassim University, Buraida, Saudi Arabia

\* Correspondence: alibahadur138@snu.ac.kr (A. B), taj\_urrehman81@yahoo.co.uk (T. U. R), muham-mad\_aurangzeb@hotmail.com (M.A.Z).

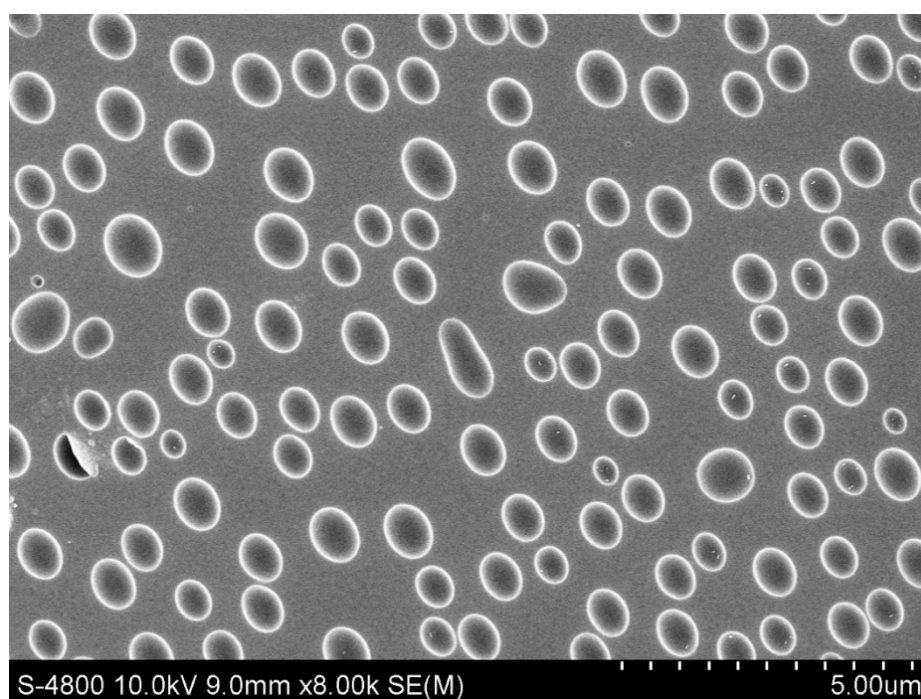

**Figure S1.** SEM images of M5 composite.

**Table S1.** Kinetic data of composite M1-M5.

| Sample         | Activation E (kJ/mol) | Order |
|----------------|-----------------------|-------|
| M              | 19.71                 | 1     |
| M1             | 9.52                  | 2     |
| M2             | 8.26                  | 2     |
| M3             | 5.82                  | 2     |
| M4             | 6.34                  | 2     |
| M5             | 5.41                  | 2     |
| $\text{AlI}_3$ | 4.36                  | 1     |

**Table S2.** The horizontal burning rate for PMMA composite.

| Composite | Burning time (s) | Length of strip (mm) | Burning rate (mm/s) |
|-----------|------------------|----------------------|---------------------|
| M         | 15               | 100                  | 6.66                |
| M1        | 51               | 100                  | 1.96                |
| M2        | 53               | 100                  | 1.88                |
| M3        | 56               | 100                  | 1.78                |
| M4        | 61               | 100                  | 1.63                |
| M5        | 67               | 100                  | 1.49                |
